# Supplementary material
Source: PubMed Central journal article supplement (PMC7422810)
Supplement: mmc1.pdf [file mmc1.pdf]

## Interview on satisfaction about telemedical counseling and treatment

name: \_\_\_\_\_

date of birth: \_\_\_\_\_

date of appointment

date of audit

native speaker    yes     no

phone             video

**Were you satisfied with the offer of telemedical counseling and treatment in general?**

yes     no

**Please think about your last appointment (phone or video). How satisfied were you with the appointment?**

much 1  2  3  4  5  6  not at all

**What were the advantages of telemedical counseling and treatment?**

- comfortable
- shorter waiting time/ I was able to do other things while waiting
- no driving time/ I did not have to look for a driver
- no expenses for travelling
- I was able to follow the conversation better.
- I was able to prepare the conversation better.
- other \_\_\_\_\_

**What were the disadvantages?**

- I appreciate personal contact as such.
- I use the appointments to get around.
- I use the appointments to talk to other patients
- No further diagnostics were carried out. Untersuchungen durchgeführt
- I did not receive my prescription.
- I could not follow the conversation well
  - I had technical problems
  - I had problems in concentration
- other: \_\_\_\_\_

**Could you imagine such appointments for you in the future in general?**

absolutely 1  2  3  4  5  6  by no means

**If not, how often do you wish personal contact on site?**

- once in 3 months       once in 6 months       once a year
- less often               upon need               no information

## For those, who have already visited the department before

---

**Please remember your last appointment (phone or video) compared to previous personal appointments:**

**Please think about your last appointment (phone or video). How satisfied were you with the appointment compared to previous ones? (same = 3)**

better 1  2  3  4  5  worse

**How much time did the doctor have for me?**

less  unchanged  more

**The advice of the doctor was understandable to me ...**

less  unchanged  better

**There was enough time for me to ask my questions.**

less  unchanged  more

**Did this appointment help you to understand and treat your illness in a similar way? (same = 3)**

better 1  2  3  4  5  worse

**Will you follow this advice as if you had appeared in person? (same = 3)**

in any case 1  2  3  4  5  surely not

---
